# Supplementary material
Source: PubMed Central journal article supplement (PMC2793191)

## SUPPLEMENTAL DATA

**Figure 1.** In control normoxic calves, distal PA (dPA) media does not contain cKit-positive (**A**) or S100A4-positive (**B**) cells, whereas the dPA media of hypertensive animals does contain some cKit+ (**C**) and S100A4+ (**D**) cells (large arrows in C and D). The dPA adventitia and/or lung parenchyma of control calves, however, does contain occasional cKit+ (**A**, small arrows) and S100A4+ (**B**, small double arrows) cells.

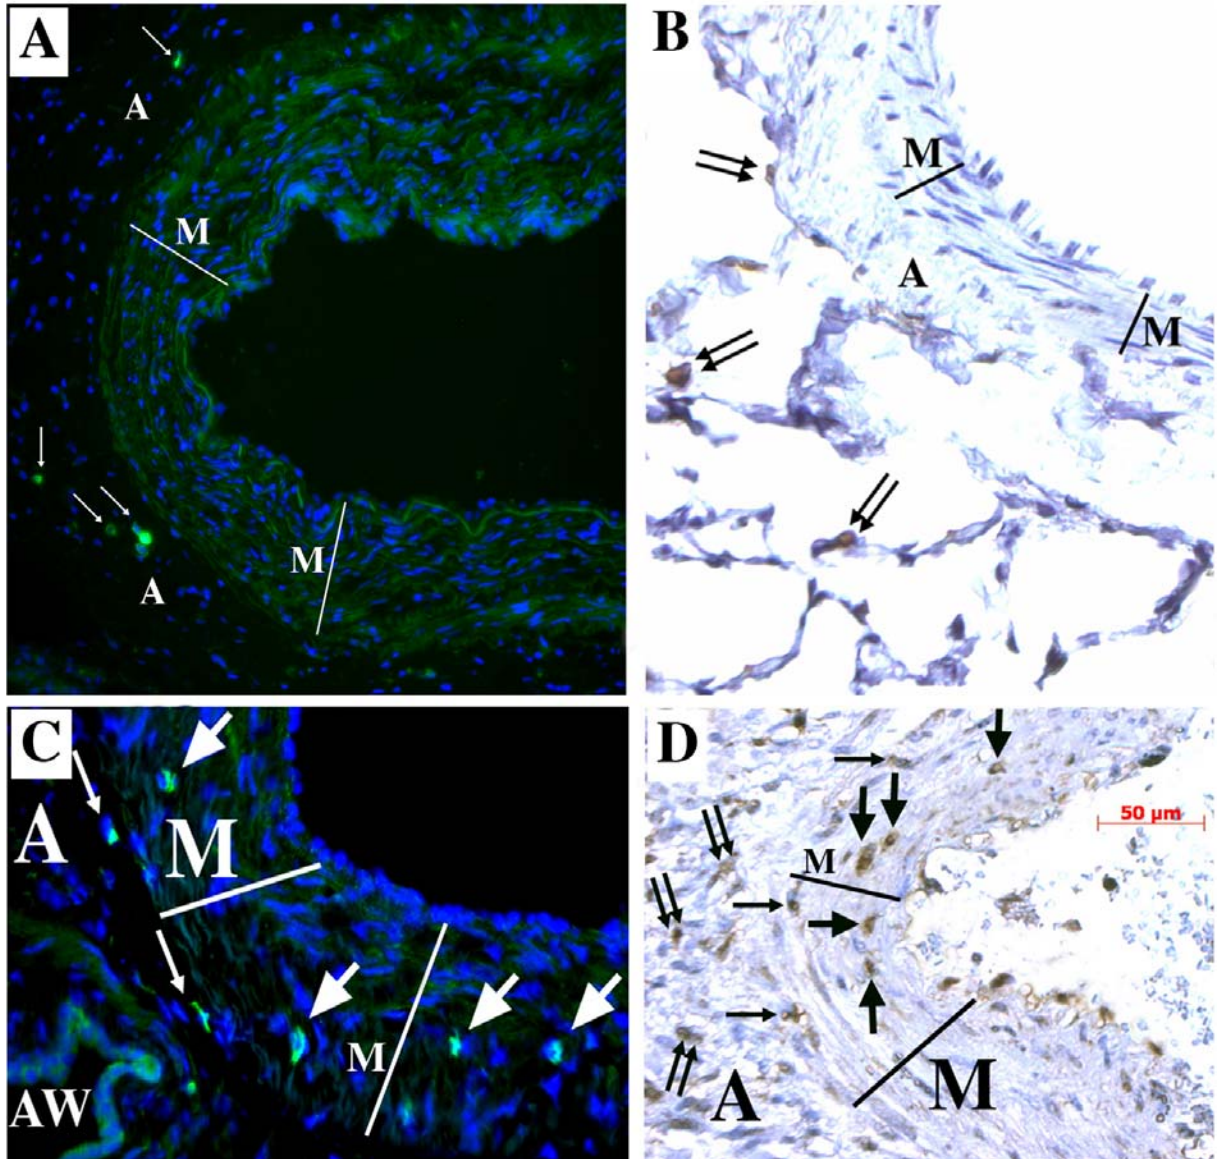

**Figure 2.** Cell size analysis demonstrates that d“S”-SMCs isolated from hypertensive calves are much larger in size than those isolated from the normoxic controls.

Cell size analysis, performed by forward scatter and expressed as channel number, was done in both the log phase of growth (in 10%CS) and under growth-arrest (72 hrs in 0.1%CS). Double-headed arrows point to the difference in cell size between control and hypertensive SMCs.

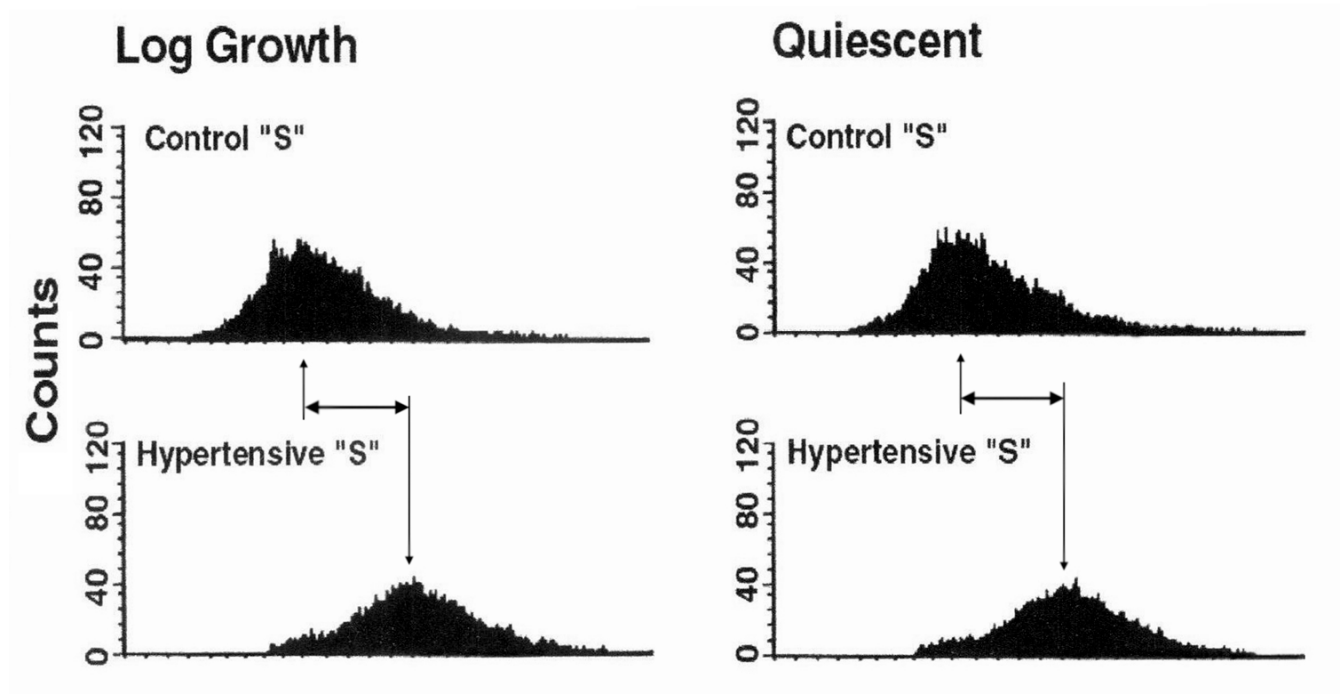

**Figure 3. d“R”-cell phenotype differs from that of pulmonary artery endothelial cells (EC).** d“R”-cells express markedly lower mRNA levels of endothelial-associated markers (VE-Cadherin, PECAM-1/CD31, Tie-2) than EC isolated from main pulmonary artery (MPA-EC) or from dPA of approx. 1000  $\mu\text{m}$  in diameter (dPA-EC) of control calves. The exception is Flt-1/VEGFR2, which is expressed by d“R”-cells and adventitial fibroblasts (Fibs) at levels comparable to those of dPA-EC, yet lower than those of MPA-EC.

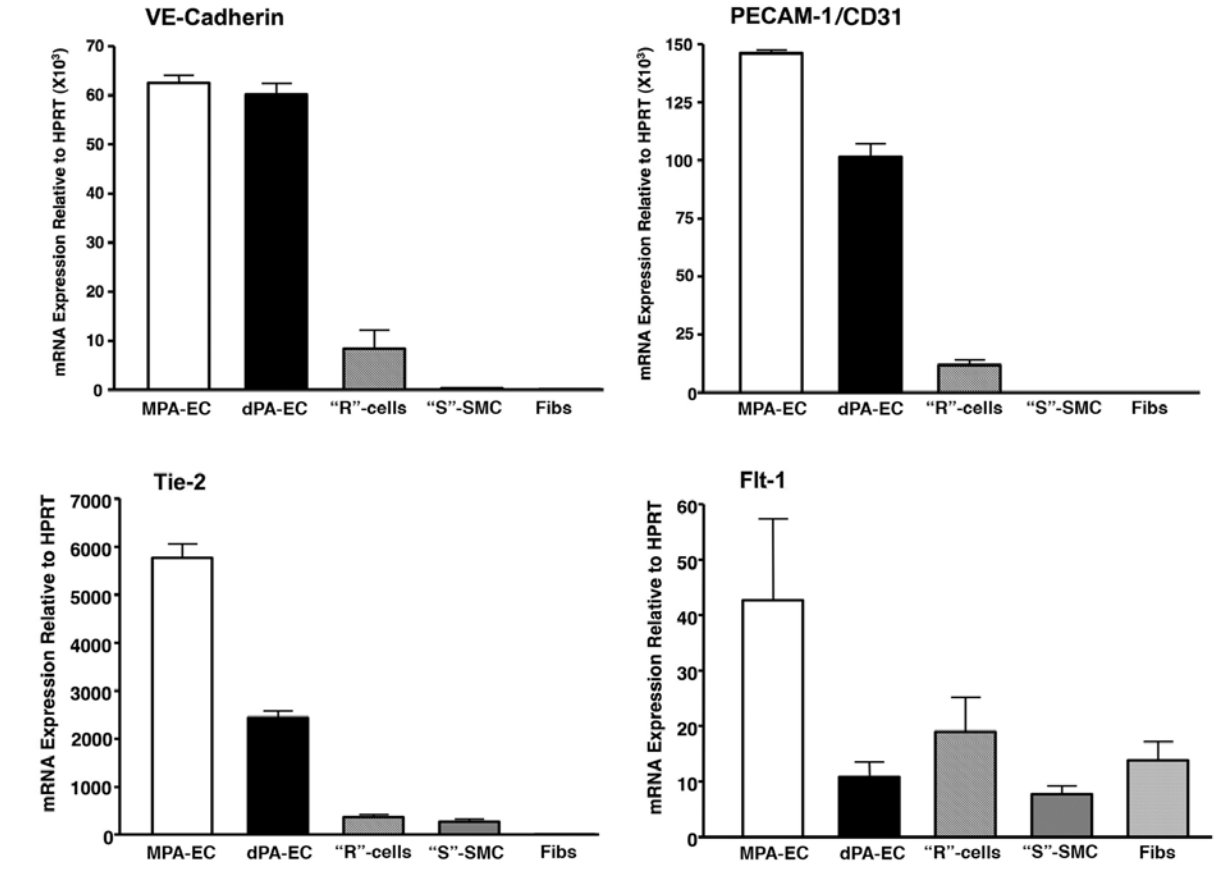

Supplement: 90611.2008_1.pdf [file 90611.2008_1.pdf]
